# Supplementary material
Source: PubMed Central journal article supplement (PMC4473193)
Supplement: JCM.00018-15_zjm999094316so1.pdf [file JCM.00018-15_zjm999094316so1.pdf]

1 **Supplement 1. Vakkila et al. 2014**

2 **Assay protocol for *S. pyogenes* specific test applying quantitative polymerase**  
 3 **chain reaction**

4 **Sample preparation**

5 Throat swab samples stored frozen in RTI sample buffer of the mariPOC<sup>®</sup> test system (ArcDia  
 6 International Oy Ltd) were thawed and total DNA was extracted with PrepMan<sup>™</sup> Ultra sample  
 7 preparation reagent (Applied Biosystems, cat 4318930). Fifty (50) µl of each sample was  
 8 centrifuged at 16 100 g for 10 minutes. Supernatants were discarded and 50 µl of PrepMan<sup>™</sup>  
 9 Ultra sample preparation reagent was added over the pellet. The tubes were vortexed for 30  
 10 seconds and placed into a heat block (100 °C) for 10 minutes. The samples were allowed to  
 11 cool down at room temperature for a few minutes and centrifuged at 16 100 g for 10 minutes.  
 12 The supernatants were transferred to new tubes and used for PCR.

13 **Real-time quantitative PCR**

14 Real-time detection of the quantitative PCR (qPCR) reaction utilized the fluorometric  
 15 measurement of the SYBR<sup>®</sup> Green I dye that binds to double stranded DNA and fluoresces  
 16 only when bound to DNA. The target gene for the detection of *Streptococcus pyogenes* was  
 17 DNaseB and the target DNA sequence length was 144 bp. Primers were purchased from Sigma  
 18 and their sequences are shown in table 1.

19 **Table 1** Sequences of the primers for DNaseB gene

| Primer  | Sequence                    | Base positions in DNaseB gene sequence |
|---------|-----------------------------|----------------------------------------|
| Forward | 5'-ACCCAAAATGTAGGAGGTCGT-3' | 556- 576                               |
| Reverse | 5'-TCTTGGAATCAACTCGTCTGC-3' | 679- 699                               |

20

21 The qPCR master mix was done by combining KAPA SYBR FAST qPCR Master Mix (Kapa  
 22 Biosystems, 2X stock, cat KK4610), primers and nuclease free water (Table 2). Real-time

23 qPCR was performed using 2  $\mu$ l of extracted DNA sample with a total reaction volume of 10  
 24  $\mu$ l.

25 **Table 2** Reagent volumes in qPCR master mix

| Reagent                             | Volume (Concentration in reaction) |
|-------------------------------------|------------------------------------|
| KAPA SYBR FAST qPCR Master Mix (2X) | 5 $\mu$ l (1X)                     |
| Forward primer (10 $\mu$ M)         | 0.2 $\mu$ l (0.2 $\mu$ M)          |
| Reverse primer (10 $\mu$ M)         | 0.2 $\mu$ l (0.2 $\mu$ M)          |
| Nuclease free water                 | 2.6 $\mu$ l                        |
| Total                               | 8 $\mu$ l                          |

26

27 LightCycler<sup>®</sup> 480 II (Roche) was used to perform the qPCR. Used PCR temperature parameters  
 28 are shown in table 3.

29 **Table 3** The program for qPCR run with LightCycler<sup>®</sup> 480 II

| Program        | Cycle(s) | Analysis       | Temperature             | Time                       | Analysis parameter         |
|----------------|----------|----------------|-------------------------|----------------------------|----------------------------|
| Pre-incubation | 1        | None           | 95 °C                   | 3 min                      |                            |
| Amplification  | 40       | Quantification | 95 °C<br>59 °C<br>72 °C | 10 sec<br>20 sec<br>10 sec | Single                     |
| Melting curve  | 1        | Melting curve  | 95 °C<br>65 °C<br>97 °C | 30 sec<br>1 min<br>-       | Continuous, 5 pictures/ °C |
| Cooling        | 1        | None           | 40 °C                   | 30 sec                     |                            |

30

31 The data analysis for each sample included quantification cycle ( $C_q$ ) and melting curve  
 32 analysis. A sample was reported to be positive for *Streptococcus pyogenes* when test results  
 33 were cycle 35 or lower for  $C_q$  and when melting temperature was between 81.4– 84.0 °C.

34
